# Supplementary material for: Proteomic Identification of Immunodiagnostic Antigens for Trypanosoma vivax Infections in Cattle and Generation of a Proof-of-Concept Lateral Flow Test Diagnostic Device
Source: PubMed Central journal article supplement (PMC5015970; doi:10.1371/journal.pntd.0004977), 2016-09-08
Supplement: pntd.0004977.s001.pdf [file pntd.0004977.s001.pdf]

**Figure S1.** Predicted amino acid sequences of the recombinant ISG domains used in this study. The amino acids highlighted in italics (*GHM*) come from the cleaved TEV site.

>TvY486\_0045500|AA\_40-363

*GHMSY*ENEIARALCKMGSTHRRMSMVFGVLQQRISKTD DTINGLETDLWKLK KAG  
LPDEKYQEVNDKVINVTGSVSLVTNAVKVAQKKLEEFIEKVKTEHYNDHYLKLEDRK  
FGESVSNCRDWATYNEETPDKLRKKLESGLKTLEAWATEESNEWEKEQKEVESDL  
LSKENRNSLQYGTLHTAFKDLVKSMVELTTVSFYMPKALEGVPGADA AVNEARK  
FVVVAMANECQSVASEAAASEEKQAQCEKLNKKLQEIKEKKRQAIGGDSEGP KSS  
DAKSTDATPTSSASQKVIVEEVLD S ADGDELMELVQTADKPSAANNSKLS

>TvY486\_0019690|AA\_42-363

*GHMEN*EIARALCKMGSTHRRMSMVFGVLKQSISKTD DTINGLETDLWKL R KAGLPD  
EKYQEVNDKVIDVTGSVSLVTNAVKVAQKKLEEFIKKIESGHYNDHYLQLEDRKFGE  
SVSNCKNSATYNEETSEQLRKKLESGIKTLKVVWAEESKEWEKEQQDAESD LLSN  
ENRNSLQYGTLHTAFKDLVNSMMVELTTVSFYMPKALEGVPGADA AVNEARKFVV  
VAMANECQSVASEAAASEEKQAQCEKLNKKLQEIKEKKRQANNGDSEGP KSSDSK  
SADATPTSSASQKVFVEEVLD SADSDELMELVQTADKPSSANNSKLS
