# Supplementary material for: Proteomic Identification of Immunodiagnostic Antigens for Trypanosoma vivax Infections in Cattle and Generation of a Proof-of-Concept Lateral Flow Test Diagnostic Device
Source: PubMed Central journal article supplement (PMC5015970; doi:10.1371/journal.pntd.0004977), 2016-09-08

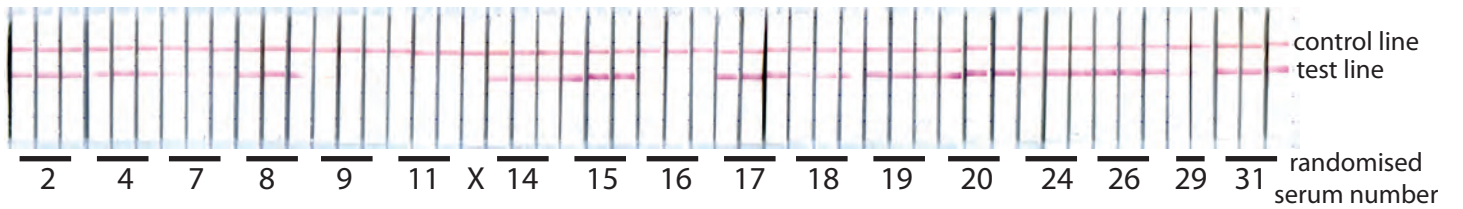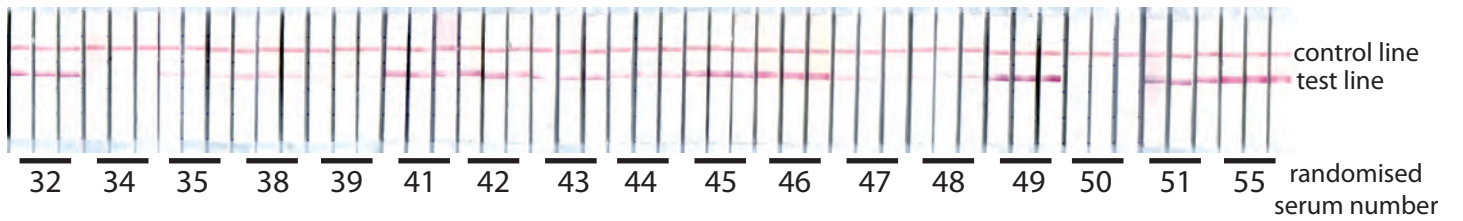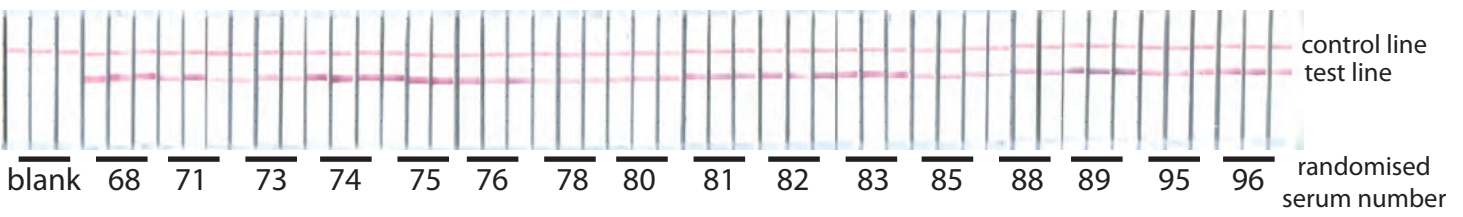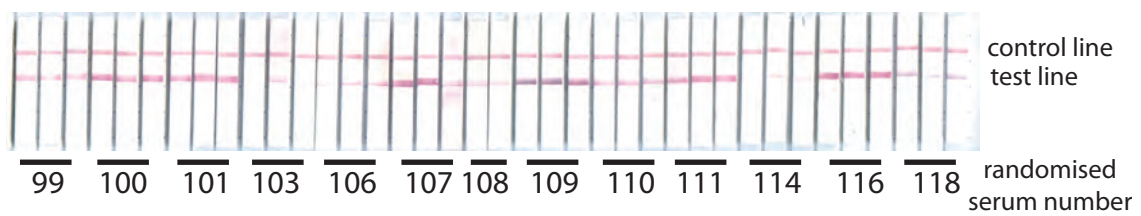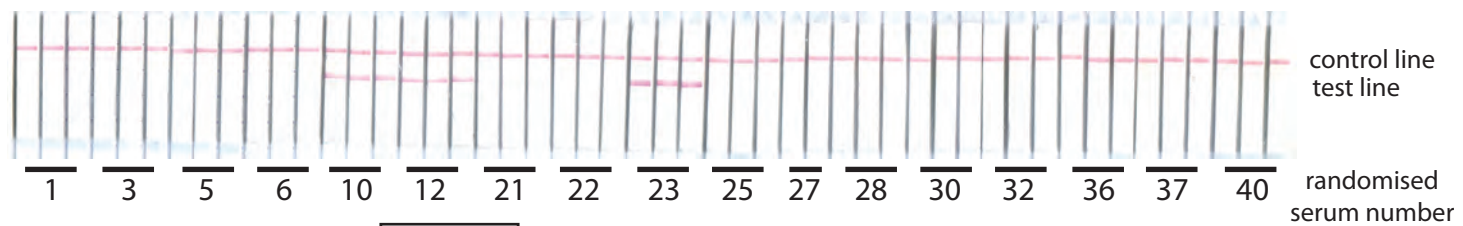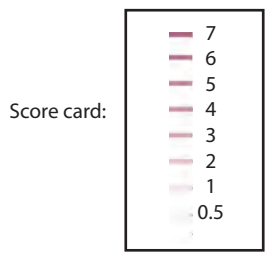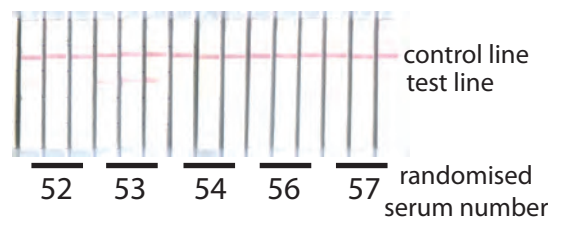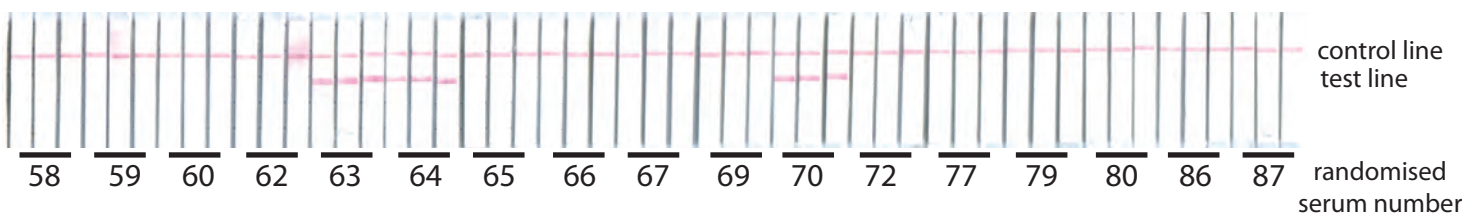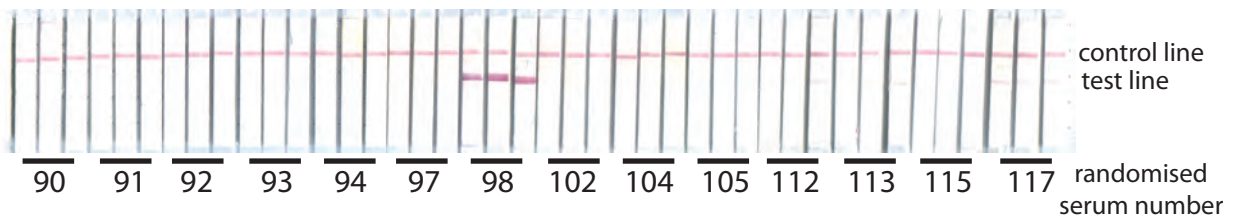

Supplement: pntd.0004977.s002.pdf [file pntd.0004977.s002.pdf]
