# Supplementary material for: Proteomic Identification of Immunodiagnostic Antigens for Trypanosoma vivax Infections in Cattle and Generation of a Proof-of-Concept Lateral Flow Test Diagnostic Device
Source: PubMed Central journal article supplement (PMC5015970; doi:10.1371/journal.pntd.0004977), 2016-09-08
Supplement: pntd.0004977.s003.pdf [file pntd.0004977.s003.pdf]

**Table S1: Quantitative proteomics results**

The antigens are ordered by their infection : control LC-MS/MS intensity ratios and color coded according to their absolute LC-MS/MS intensities: black bold >1000; black > 500; grey >10

| Protein ID                                                                                                                                  | Control:infected ratio | intensity 10 <sup>6</sup> | Putative name/protein family      |
|---------------------------------------------------------------------------------------------------------------------------------------------|------------------------|---------------------------|-----------------------------------|
| TvY486_0806350                                                                                                                              | 74.33                  | 37.734                    |                                   |
| <b>TvY486_0045500</b>                                                                                                                       | <b>32.15</b>           | <b>2875.40</b>            | <b>ISG</b>                        |
| REV__TvY486_1013780                                                                                                                         | 31.28                  | 93.62                     | arm                               |
| <b>TvY486_0019690</b>                                                                                                                       | <b>29.46</b>           | <b>1030.10</b>            | <b>ISG</b>                        |
| TvY486_0806260                                                                                                                              | 24.79                  | 83.81                     | guanine deaminase                 |
| TvY486_0040570                                                                                                                              | 23.77                  | 30.10                     |                                   |
| TvY486_0304300                                                                                                                              | 16.15                  | 74.97                     | 5-histidyl sulfoxide synthase     |
| TvY486_0704280<br>;TvY486_0704300                                                                                                           | 14.02                  | 52.13                     | adomet mtase, fge sulfatase       |
| TvY486_0040800<br>;TvY486_0013960<br>;TvY486_0040500<br>;TvY486_0027530<br>;TvY486_0010260<br>;TvY486_0027540                               | 13.75                  | 42.68                     | VSG                               |
| TvY486_0040090<br>;TvY486_0034340<br>;TvY486_0022920<br>;TvY486_0034330<br>;TvY486_0002180<br>;TvY486_0045260<br>;TvY486_0000TvY486_0019690 | 13.04                  | 32.17                     |                                   |
| TvY486_1003730                                                                                                                              | 12.32                  | 610.93                    | proteasome activator protein pa26 |
| TvY486_1106220                                                                                                                              | 9.71                   | 60.63                     | ribosome binding                  |
| TvY486_1103390                                                                                                                              | 9.55                   | 49.96                     | ubiquitin-conjugating enzyme      |
| TvY486_0906400                                                                                                                              | 9.54                   | 132.31                    | syntaxin                          |
| TvY486_0009580                                                                                                                              | 9.29                   | 65.29                     | VSG                               |

|                                   |      |        |                              |
|-----------------------------------|------|--------|------------------------------|
| ;TvY486_0018880                   |      |        |                              |
| TvY486_0023330                    | 9.25 | 76.89  |                              |
| TvY486_0603490                    | 8.25 | 150.23 | kinase/hydrolase             |
| TvY486_0007180                    | 7.59 | 99.96  |                              |
| TvY486_0702240                    | 6.68 | 42.57  | tyrosyl-tRNA synthetase,     |
| TvY486_0041380<br>;TvY486_0038160 | 6.56 | 12.50  |                              |
| TvY486_0040150                    | 6.47 | 16.71  |                              |
| TvY486_1106950                    | 6.46 | 852.61 | M17 aminopeptidase           |
| TvY486_0010TvY486<br>_0019690     | 6.32 | 9.46   |                              |
| TvY486_1109080<br>;TvY486_1109070 | 5.14 | 410.26 | ribonuclease II-like protein |
